# Supplementary material
Source: PubMed Central journal article supplement (PMC7926232)
Supplement: EMBR-22-e50629-s001.pdf [file EMBR-22-e50629-s001.pdf]

## Expanded View Figures

### Figure EV1. FUNDC1 is regulated by PGC-1 $\alpha$ .

- A–C Oil red O staining (A) analysis of differentiated brown adipocytes (5 days) and Western blotting analysis (B) of brown preadipocytes (0 days) and differentiated cells (5 days), scale bar, 10  $\mu$ m. The expression levels of the indicated proteins are quantified in (C). Data information: experiments were repeated three times, data are represented as the mean  $\pm$  SEM. Statistical analysis was performed using two-tailed Student's *t*-test. ns: no significant difference; \**P* < 0.05.
- D–F Brown fat preadipocytes were infected with control adenovirus and adenovirus expressing PGC-1 $\alpha$ . GFP expression was used as an indicator for cell infection, scale bar, 10  $\mu$ m (D). Levels of the indicated proteins were analyzed by Western blotting and quantified (E, F). Data information: experiments were repeated three times, data are represented as the mean  $\pm$  SEM. Statistical analysis was performed using two-tailed Student's *t*-test. ns: no significant difference; \**P* < 0.05.
- G, H Western blotting analysis of the indicated proteins in HeLa (G) and 293 (H) cells transfected with control vector and a Flag-PGC-1 $\alpha$  expression construct. Quantification of the expression levels of the indicated proteins is shown in the panel below. Data information: Experiments were repeated three times, and data are represented as the mean  $\pm$  SEM. Statistical analysis was performed using two-tailed Student's *t*-test. \**P* < 0.05.

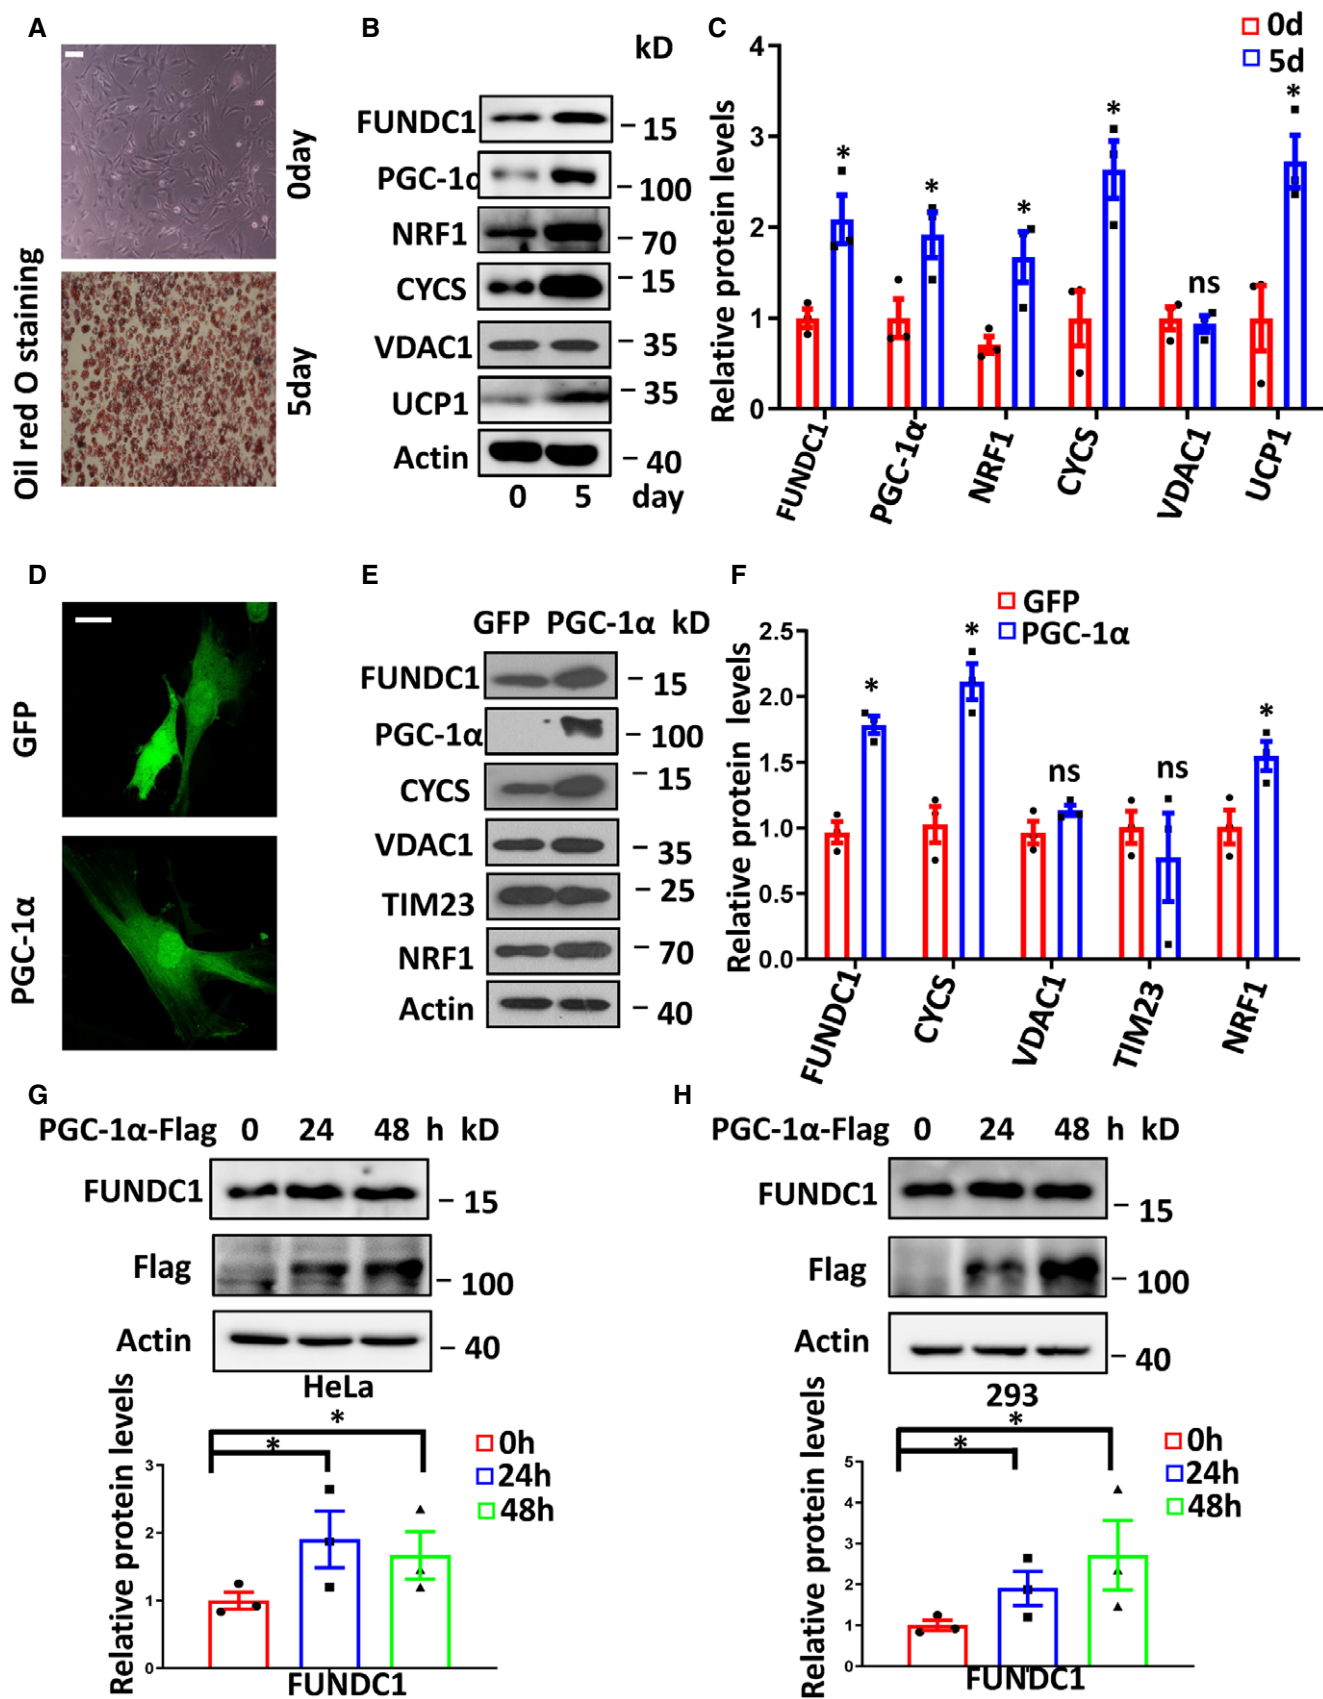

Figure EV1.

**Figure EV2. PGC-1 $\alpha$  and NRF1 are essential for expression of *Fundc1*, and the autophagic flux is enhanced by cold exposure in BAT.**

- A–C Western blotting analysis of the indicated proteins in scramble, PGC-1 $\alpha$  knockdown, and PGC-1 $\beta$  knockdown brown fat preadipocytes (A). Expression levels of the indicated proteins were quantified (B). Real-time PCR analysis of the expression of the indicated genes in scramble, PGC-1 $\alpha$  knockdown, and PGC-1 $\beta$  knockdown brown fat preadipocytes (C). Data information: Experiments were repeated three times, and data are represented as the mean  $\pm$  SEM. Statistical analysis was performed using two-tailed Student's *t*-test. ns: no significant difference; \**P* < 0.05; \*\**P* < 0.01; \*\*\**P* < 0.001.
- D, E Scramble and NRF1 knockdown preadipocytes were induced to differentiate into mature adipocytes, and samples were collected for Western blotting analyses and quantification of the indicated proteins. Data information: Experiments were repeated three times, and data are represented as the mean  $\pm$  SEM. Statistical analysis was performed using two-tailed Student's *t*-test. ns: no significant difference; \*\**P* < 0.01.
- F Expression of the indicated genes was analyzed by real-time PCR in BAT before and after cold exposure (4°C) for 72 h. Data information: *n* = 3 biological replicates, data are represented as the mean  $\pm$  SEM. Statistical analysis was performed using two-tailed Student's *t*-test. \**P* < 0.05.
- G, H The WT mice were treated with chloroquine (CQ; 30 mg/kg/day) for 72h in normal or cold conditions, and the expression of LC3B was detected by Western blotting. The expression of LC3BII was quantified and plotted (H). Data information: *n* = 6 biological replicates, data are represented as the mean  $\pm$  SEM. Statistical analysis was performed using two-way ANOVA test. \*\**P* < 0.01.

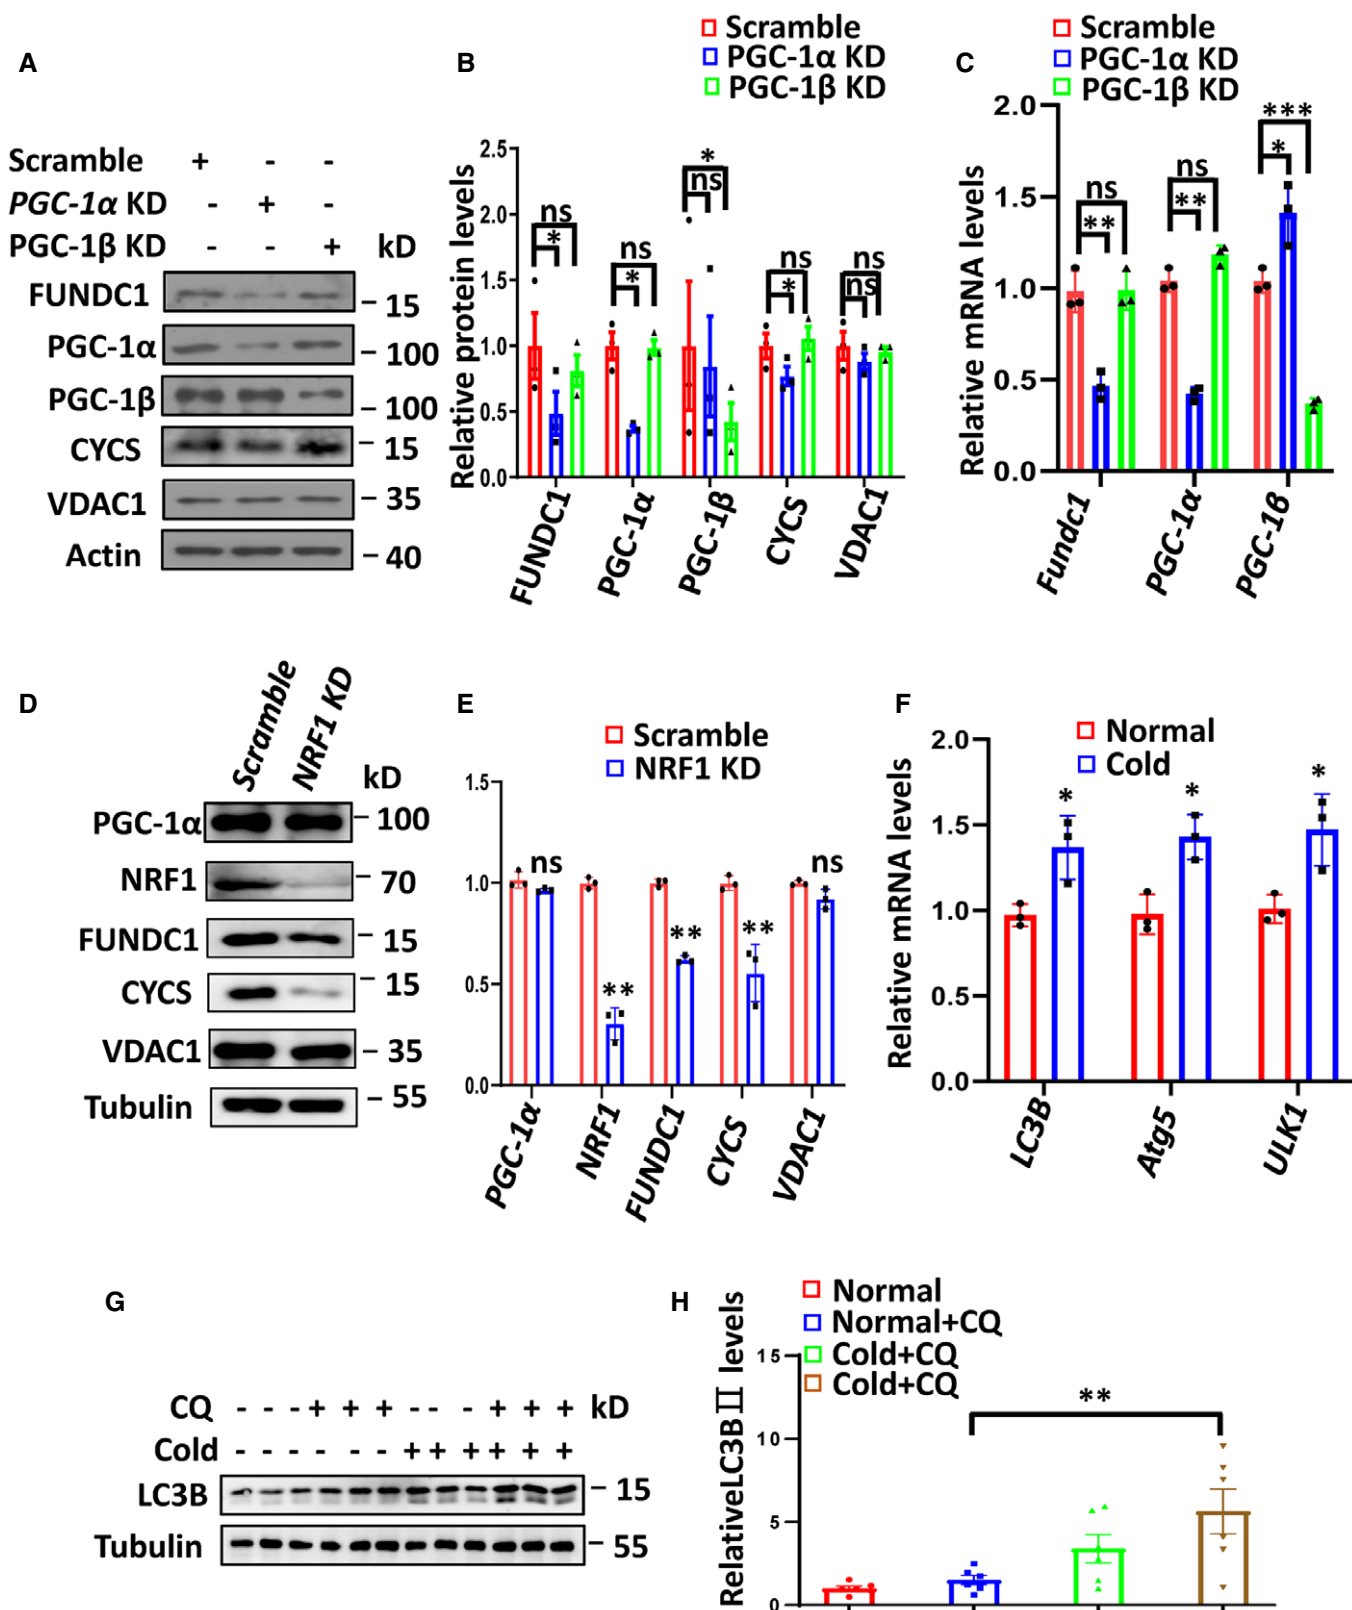

Figure EV2.

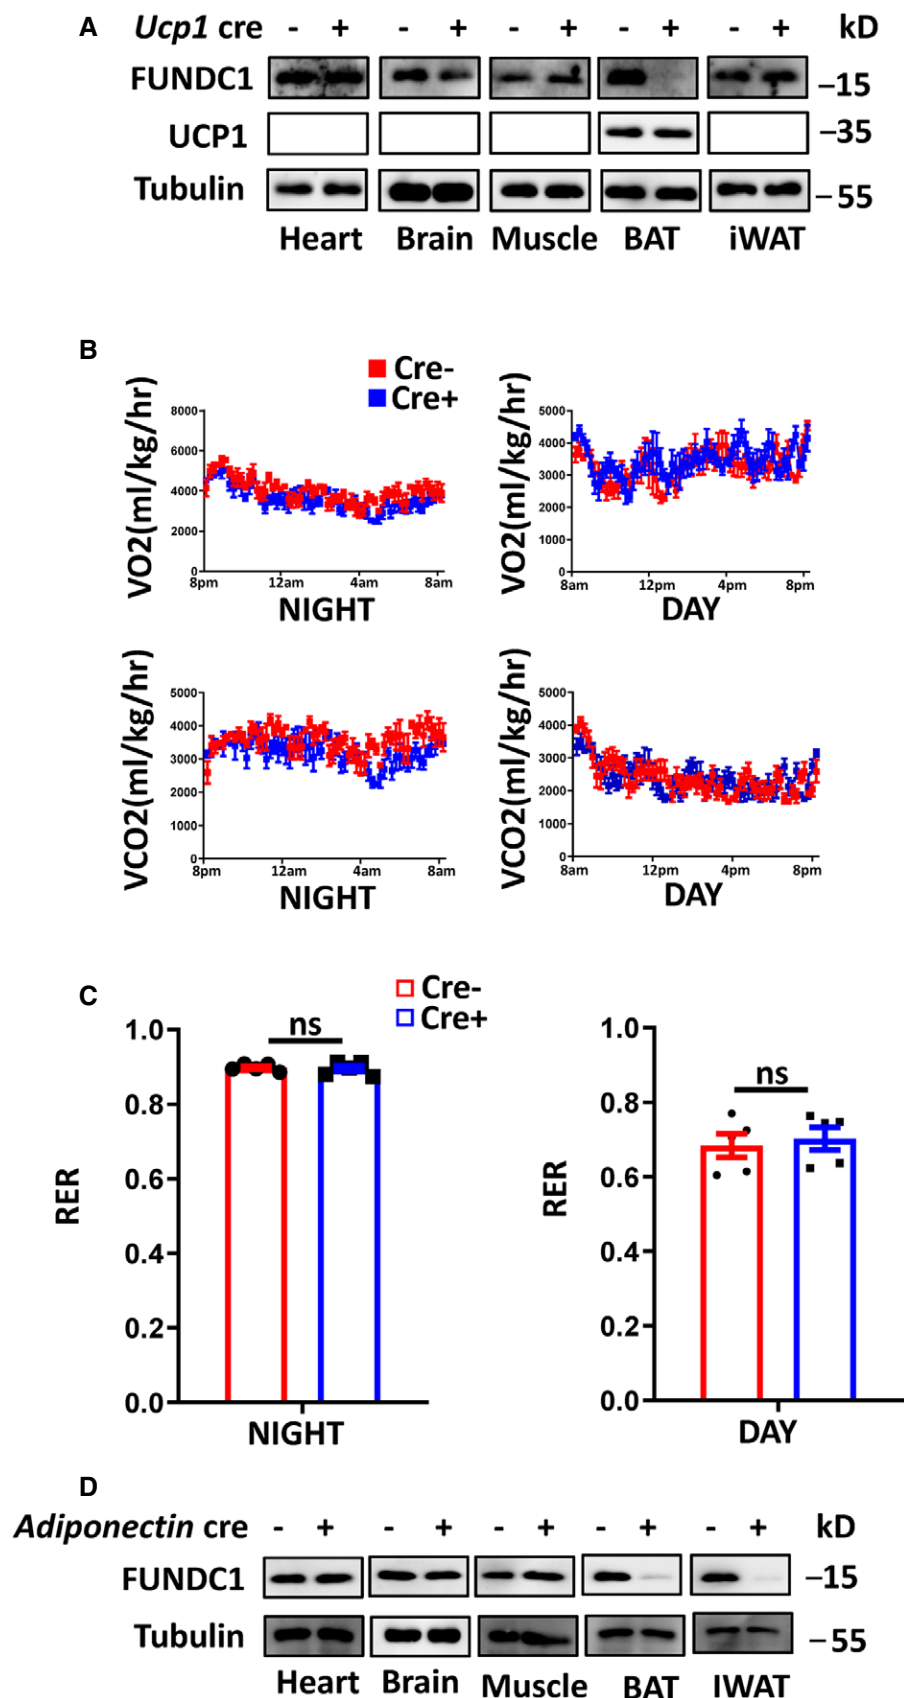

**Figure EV3. Generation of mice with brown adipocyte-specific or adipocyte-specific knockout of *Fundc1*.**

**A** Western blot analysis of FUNDC1 in different tissues in *Fundc1<sup>fl/fl</sup>/Ucp1<sup>Cre-</sup>* (*Ucp1* Cre-) and *Fundc1<sup>fl/fl</sup>/Ucp1<sup>Cre+</sup>* (*Ucp1* Cre+) mice. BAT, brown adipose tissue; iWAT, inguinal white adipose tissue.

**B** Rates of O<sub>2</sub> consumption (VO<sub>2</sub>) and CO<sub>2</sub> production (VCO<sub>2</sub>) were measured in *Fundc1<sup>fl/fl</sup>/Ucp1<sup>Cre-</sup>* (Cre-) and *Fundc1<sup>fl/fl</sup>/Ucp1<sup>Cre+</sup>* (Cre+) mice. Data information: *n* = 5 biological replicates, data are represented as the mean ± SEM.

**C** Respiratory exchange rate (RER) of *Fundc1<sup>fl/fl</sup>/Ucp1<sup>Cre-</sup>* (Cre-) and *Fundc1<sup>fl/fl</sup>/Ucp1<sup>Cre+</sup>* (Cre+) mice. Data information: *n* = 5 biological replicates, data are represented as the mean ± SEM. Statistical analysis was performed using two-tailed Student's *t*-test. ns: no significant difference.

**D** Western blot analysis of FUNDC1 in different tissues in *Fundc1<sup>fl/fl</sup>/Adiponectin<sup>Cre-</sup>* (*Adiponectin* Cre-) and *Fundc1<sup>fl/fl</sup>/Adiponectin<sup>Cre+</sup>* (*Adiponectin* Cre+) mice.

**Figure EV4. Ablation of *Fundc1* suppresses mitochondrial biogenesis without affecting autophagy proteins.**

- A–D *Ucp1* Cre- and *Ucp1* Cre+ mice were exposed to 4°C for 72 h and control mice were kept at 30°C. Autophagy-related protein (A) and mitochondrial protein (C) levels were analyzed by Western blotting. Protein expression levels were quantified and normalized to tubulin and plotted (B, D). Data information:  $n = 6$  biological replicates, data are represented as the mean  $\pm$  SEM. Statistical analysis was performed using two-way ANOVA test. ns: no significant difference; \*\* $P < 0.01$ ; \*\*\* $P < 0.001$ .
- E Wild-type (WT) and *Ucp1* Cre+ WT mice were exposed to 4°C for 72 h (Cold), and control mice were kept at 30°C (Normal). Western blotting analysis of UPC1 protein levels.

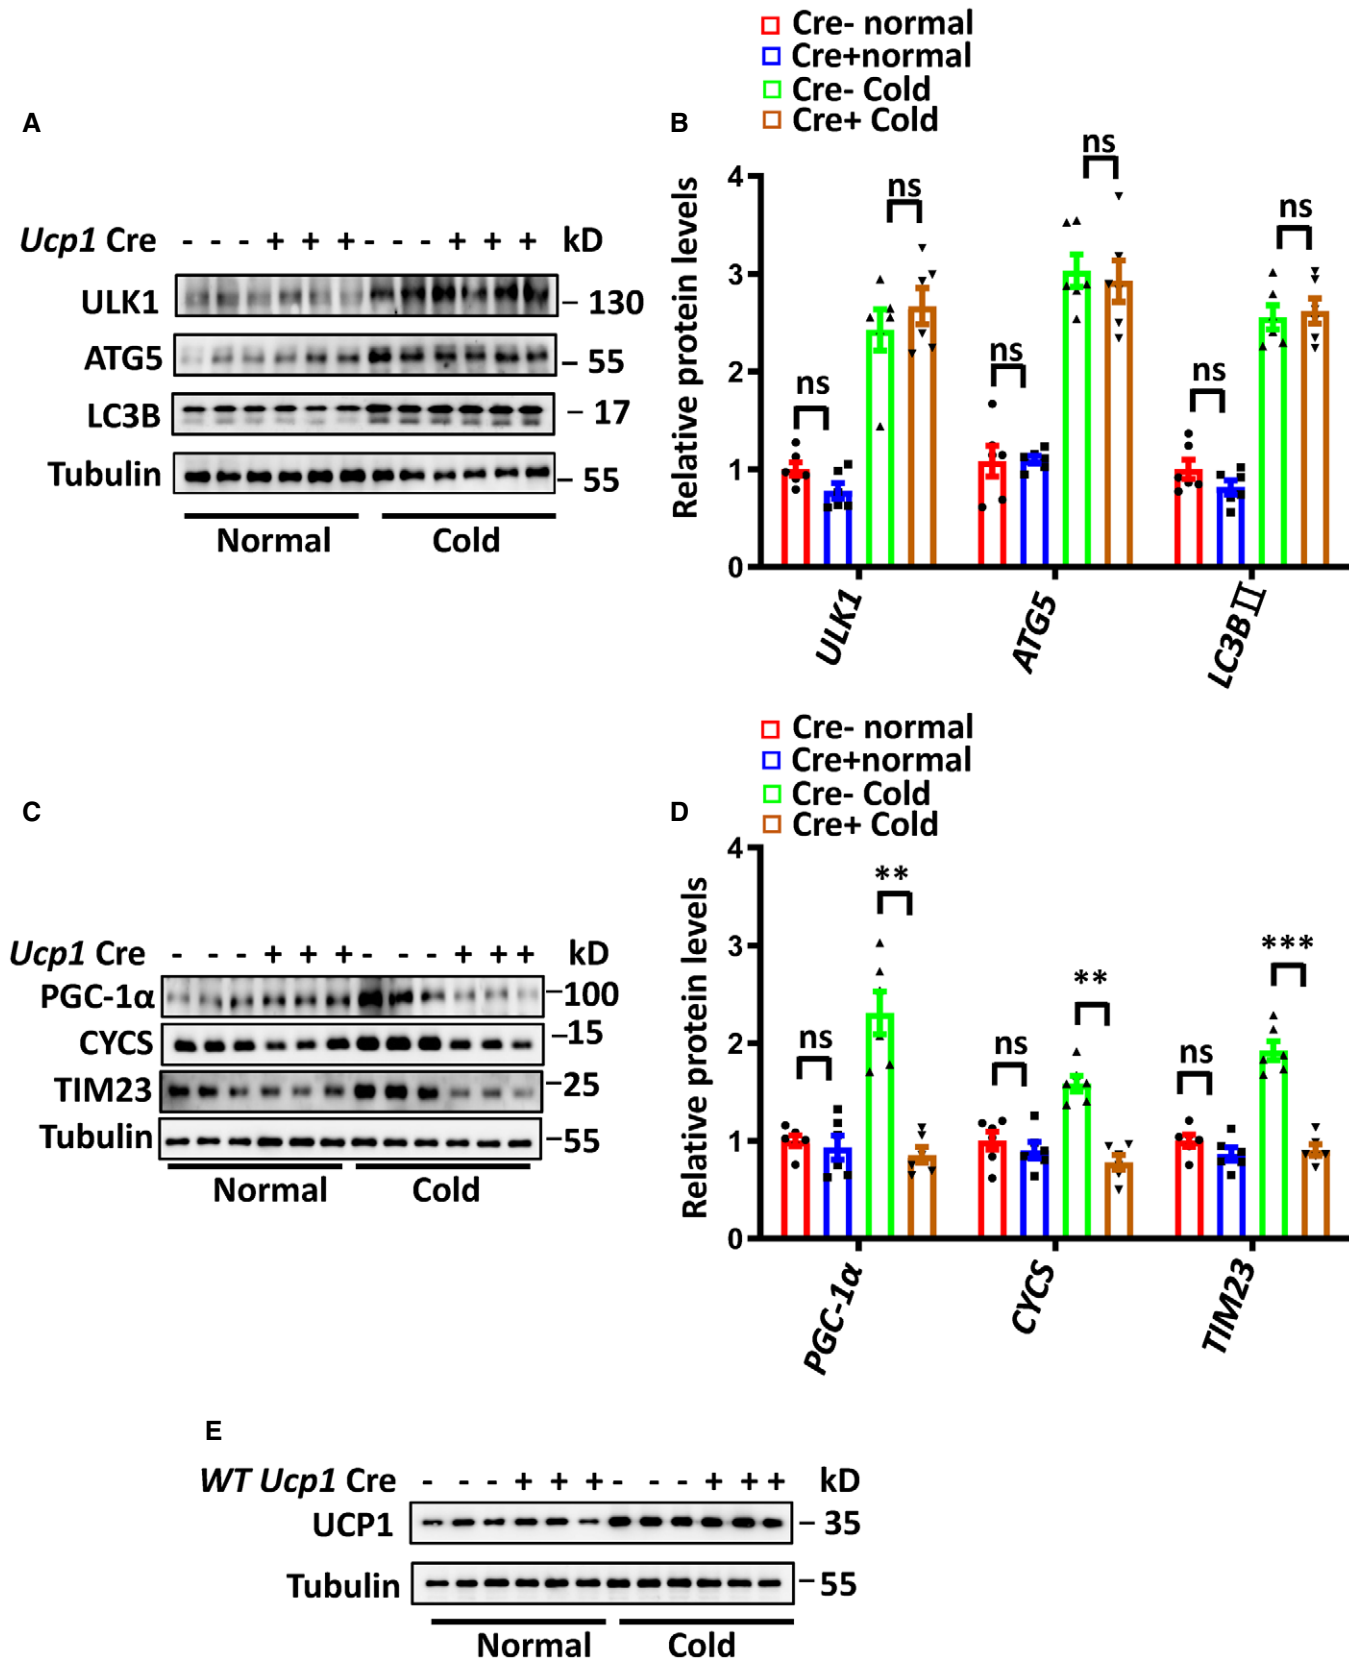

Figure EV4.

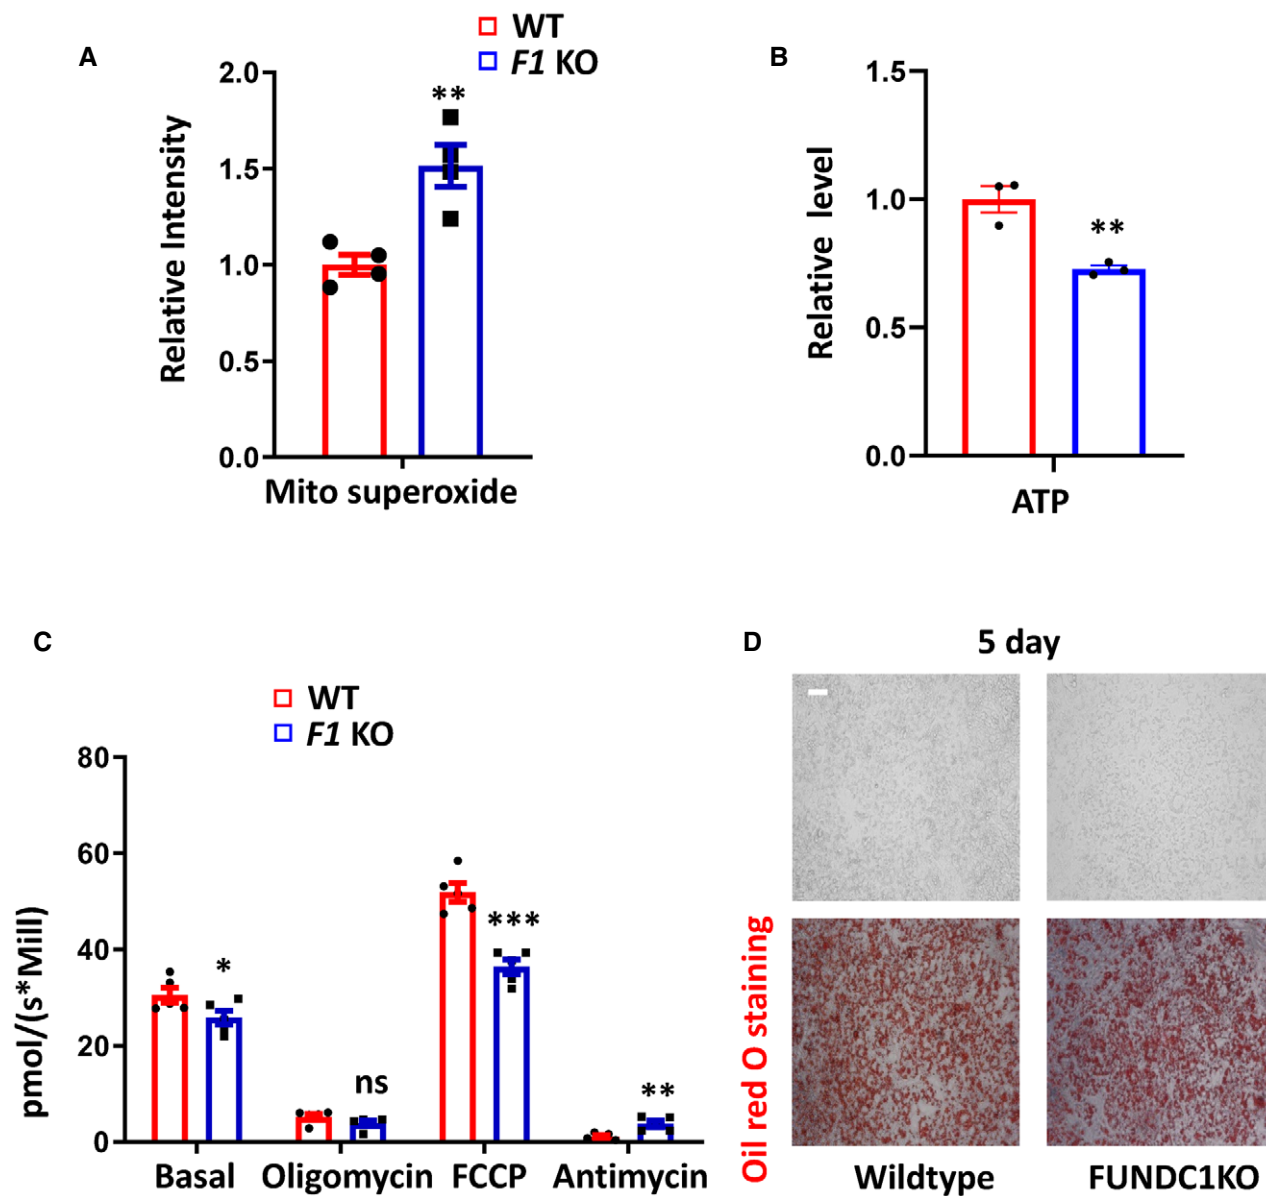

**Figure EV5. FUNDC1-dependent mitophagy controls mitochondrial quality.**

- A Mitochondrial ROS levels were measured by Mito-Sox staining in WT and *Fundc1* knockout (*F1* KO) brown fat preadipocytes. Data information: Experiments were repeated four times, and data are represented as the mean  $\pm$  SEM. Statistical analysis was performed using two-tailed Student's *t*-test.  $**P < 0.01$ .
- B ATP levels were measured with a luciferase assay kit in WT and *Fundc1* KO preadipocytes. Data information: Experiments were repeated three times, and data are represented as the mean  $\pm$  SEM. Statistical analysis was performed using two-tailed Student's *t*-test.  $**P < 0.01$ .
- C OCR was measured in WT and *Fundc1* KO preadipocytes. Data information: Experiments were repeated four times, and data are represented as the mean  $\pm$  SEM. Statistical analysis was performed using two-tailed Student's *t*-test.  $*P < 0.05$ ;  $**P < 0.01$ ;  $***P < 0.001$ .
- D Oil red O staining analysis of wild-type and *Fundc1* KO brown fat cells after differentiation for 5 days, scale bar, 10  $\mu$ m.
