# Supplementary material
Source: PubMed Central journal article supplement (PMC7926232)

Figure EV3

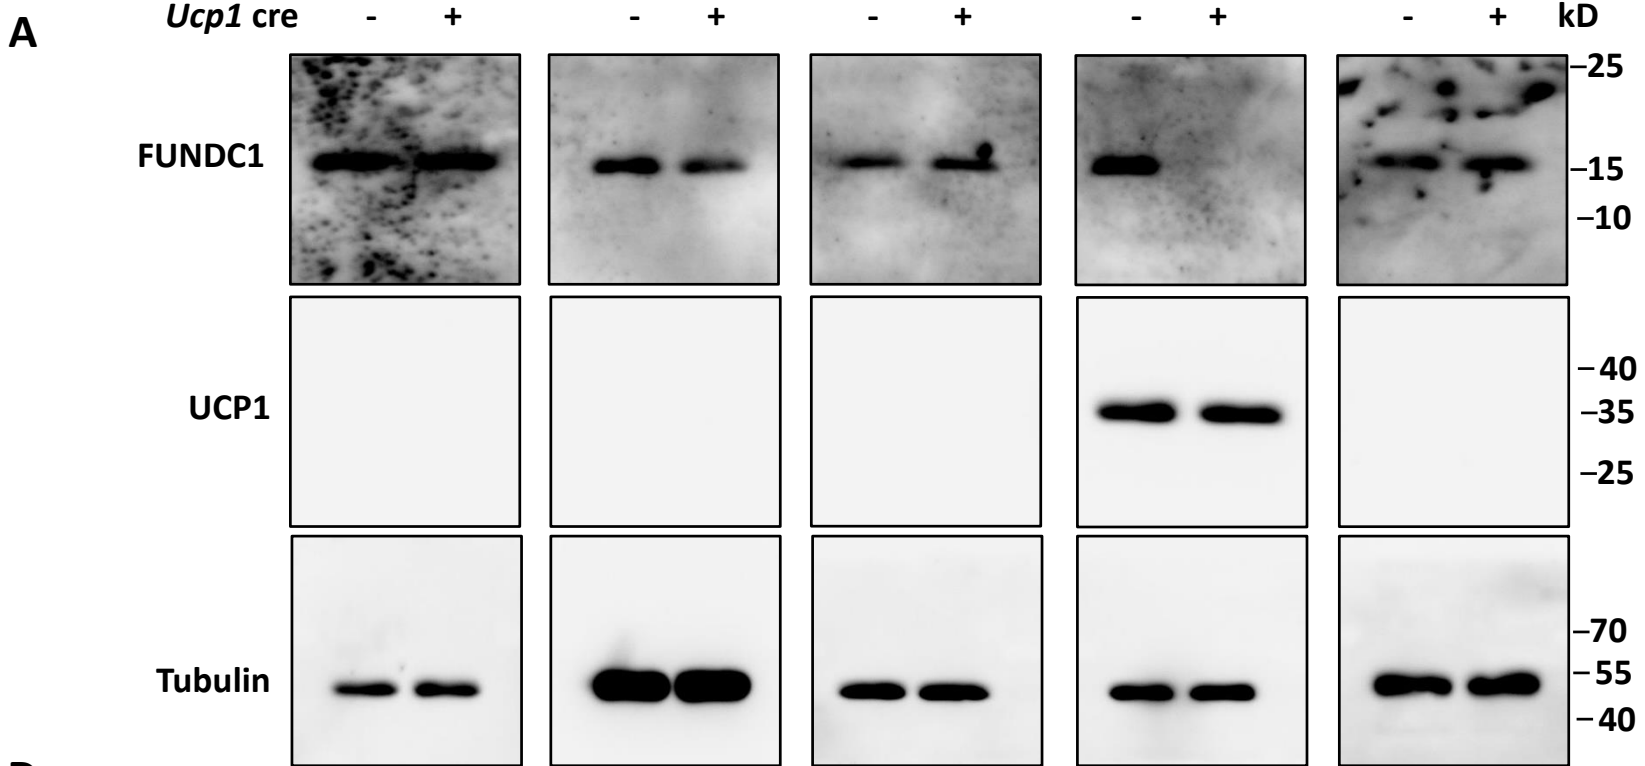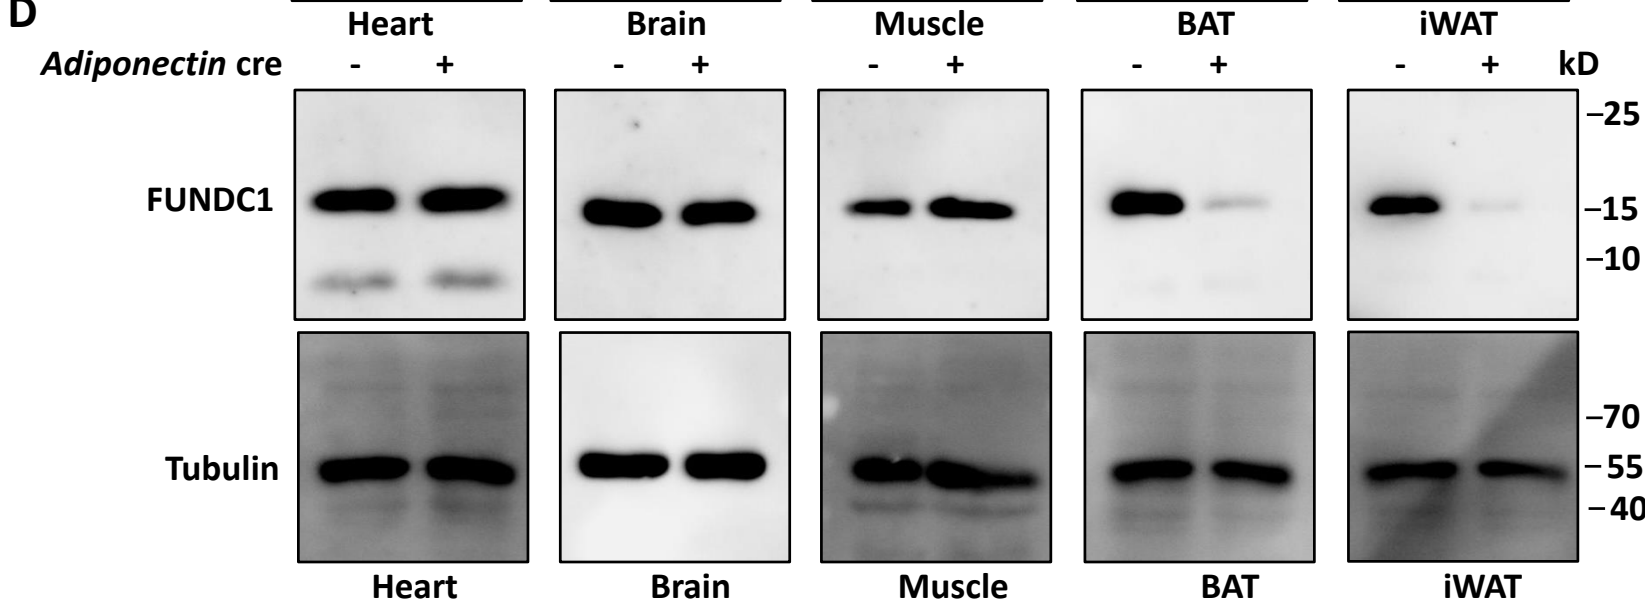

Supplement: EMBR-22-e50629-s002.pdf [file EMBR-22-e50629-s002.pdf]
